# Supplementary material for: Expression of socially sensitive genes: The multi-ethnic study of atherosclerosis
Source: PLoS One. 2019 Apr 11;14(4):e0214061. doi: 10.1371/journal.pone.0214061 (PMC6459532; doi:10.1371/journal.pone.0214061)
Supplement: S3 Table — (CSV) [file pone.0214061.s003.csv]

S3. Transcripts (Genes) with p<0.05 in Linear Regression Analyses by Social Environmental Factor
Loneliness		Major or Lifetime Discrimination		Perceived Stress		Chronic Burden		Social Support		Adult SES										Childhood SES
Illumina Transcript ID #	Gene Symbol	Illumina Transcript ID #	Gene Symbol	Illumina Transcript ID #	Gene Symbol	Illumina Transcript ID #	Gene Symbol	Illumina Transcript ID #	Gene Symbol	Illumina Transcript ID #									Gene Symbol	Illumina Transcript ID #	Gene Symbol
ILMN_1652825	IL10RA	ILMN_1652198	CCM2	ILMN_1651433	DCK	ILMN_1651735	TGOLN2	ILMN_1652825	IL10RA	ILMN_1652394									RAB2A	ILMN_1654262	ZMAT3
ILMN_1653443	CDK2	ILMN_1654545	CPSF1	ILMN_1653266	DNAJB14	ILMN_1652085	MPHOSPH1	ILMN_1657619	DNAJB14	ILMN_1652777									CDC42EP2	ILMN_1658494	RGCC
ILMN_1653480	CCDC125	ILMN_1654812	UNC93B1	ILMN_1653283	APP	ILMN_1654545	CPSF1	ILMN_1660661	TCP1	ILMN_1652806									ATP5J	ILMN_1662488	MED23
ILMN_1655422	RPL17	ILMN_1655177	PI4KA	ILMN_1655414	TNFSF14	ILMN_1654560	N/A	ILMN_1662451	FCER2	ILMN_1652906									GBGT1	ILMN_1664094	P2RY13
ILMN_1656011	RGS1	ILMN_1656011	RGS1	ILMN_1657857	TMEM14C	ILMN_1654583	CHD1	ILMN_1662896	WDR11	ILMN_1656310									IDO1	ILMN_1671731	AVPI1
ILMN_1656486	DNAJC10	ILMN_1656184	N/A	ILMN_1657977	MSRB2	ILMN_1655177	PI4KA	ILMN_1664094	P2RY13	ILMN_1659463									APAF1	ILMN_1672650	PKM
ILMN_1657977	MSRB2	ILMN_1661695	IRAK3	ILMN_1662358	MX1	ILMN_1655930	ELL2	ILMN_1665243	FKBP14	ILMN_1660027									FCGR2B	ILMN_1688098	TBC1D4
ILMN_1659227	CD79A	ILMN_1664016	ARHGEF18	ILMN_1664098	FASTK	ILMN_1656761	TGIF1	ILMN_1667893	TNS3	ILMN_1662617									PPP2R3C	ILMN_1688959	CD27
ILMN_1660847	PFKFB3	ILMN_1666364	COQ10A	ILMN_1667476	LTBR	ILMN_1657797	FIBP	ILMN_1669062	N/A	ILMN_1663484									N/A	ILMN_1689274	NIPA1
ILMN_1661646	BANK1	ILMN_1666552	ZNF75A	ILMN_1668979	DNAJB14	ILMN_1661833	ANKRD12	ILMN_1670145	DFNA5	ILMN_1664068									ERGIC1	ILMN_1693220	AKAP11
ILMN_1661695	IRAK3	ILMN_1666733	CXCL8	ILMN_1672503	DPYSL2	ILMN_1663664	MRPS10	ILMN_1671250	CLIC4	ILMN_1665217									CEP19	ILMN_1693771	ASPH
ILMN_1662795	CA2	ILMN_1666742	C9orf72	ILMN_1673352	IFITM2	ILMN_1664016	ARHGEF18	ILMN_1673586	SLC6A6	ILMN_1667594									KLF10	ILMN_1695711	FAM105A
ILMN_1663664	MRPS10	ILMN_1667460	SULF2	ILMN_1674574	VNN1	ILMN_1664449	ALG5	ILMN_1675156	CDC42	ILMN_1667711									PLA2G16	ILMN_1696041	CDC42
ILMN_1665964	GAB2	ILMN_1668345	OAF	ILMN_1675756	KCNJ15	ILMN_1665049	SPG11	ILMN_1683023	PDGFC	ILMN_1668484									LRRC47	ILMN_1696806	N/A
ILMN_1666932	FCGR2A	ILMN_1669523	FOS	ILMN_1678546	PEX11B	ILMN_1665192	NUDT6	ILMN_1685057	SLC22A4	ILMN_1668979									DNAJB14	ILMN_1700306	OCIAD2
ILMN_1667796	N/A	ILMN_1669888	CSTA	ILMN_1683786	N/A	ILMN_1665964	GAB2	ILMN_1686884	IL1RAP	ILMN_1669062									N/A	ILMN_1707137	C17orf97
ILMN_1668134	GSTM1	ILMN_1670439	FYTTD1	ILMN_1684585	ACSL1	ILMN_1667068	ZC3HAV1	ILMN_1689734	IL1RN	ILMN_1670925									CYB5D1	ILMN_1708041	PLEKHF1
ILMN_1668345	OAF	ILMN_1671509	CCL3	ILMN_1685009	ITGAM	ILMN_1667460	SULF2	ILMN_1694966	ASGR2	ILMN_1674394									APMAP	ILMN_1710734	GZMK
ILMN_1668526	GVINP1	ILMN_1671891	PID1	ILMN_1686645	UTP14C	ILMN_1667893	TNS3	ILMN_1696432	IDH1	ILMN_1675156									CDC42	ILMN_1713803	C17orf97
ILMN_1669523	FOS	ILMN_1672660	MBP	ILMN_1687785	PPA2	ILMN_1668484	LRRC47	ILMN_1696749	LMNA	ILMN_1678293									N/A	ILMN_1717063	FBXO9
ILMN_1670134	FADS1	ILMN_1673113	F2RL1	ILMN_1688152	IL27RA	ILMN_1670145	DFNA5	ILMN_1697469	SRSF6	ILMN_1679268									PELI1	ILMN_1717261	HLA-DRB3
ILMN_1670145	DFNA5	ILMN_1674574	VNN1	ILMN_1688452	LCMT1	ILMN_1670322	FCHO2	ILMN_1700340	ASGR2	ILMN_1680687									NSF	ILMN_1718718	MKKS
ILMN_1670926	CHST15	ILMN_1677511	PTGS2	ILMN_1690476	QKI	ILMN_1671731	AVPI1	ILMN_1703229	N/A	ILMN_1681301									AIM2	ILMN_1719232	DGCR14
ILMN_1674574	VNN1	ILMN_1678707	TAF15	ILMN_1693338	CYP1B1	ILMN_1673023	EP400	ILMN_1703617	AHSA1	ILMN_1687410									OSBPL11	ILMN_1721081	SP4
ILMN_1675669	IBTK	ILMN_1679929	KLF13	ILMN_1694268	HES6	ILMN_1673478	FAM13B	ILMN_1703697	LANCL1	ILMN_1693338									CYP1B1	ILMN_1735151	EIF5A2
ILMN_1677511	PTGS2	ILMN_1680618	MYC	ILMN_1694587	EEF1B2	ILMN_1675156	CDC42	ILMN_1703946	ADORA2B	ILMN_1695316									SLC39A8	ILMN_1739674	N/A
ILMN_1677574	GALNT6	ILMN_1682098	PSMA4	ILMN_1694966	ASGR2	ILMN_1679232	KIDINS22	ILMN_1704713	CSNK1G1	ILMN_1695590									ADRB2	ILMN_1746426	TOMM70A
ILMN_1679268	PELI1	ILMN_1682717	IER3	ILMN_1696584	ORM1	ILMN_1679727	CLK1	ILMN_1706553	SMG7	ILMN_1696432									IDH1	ILMN_1749253	TUBD1
ILMN_1679727	CLK1	ILMN_1682781	TEAD2	ILMN_1699878	RAB27A	ILMN_1679929	KLF13	ILMN_1714650	RASGRP4	ILMN_1696975									USP1	ILMN_1751400	SKAP1
ILMN_1682147	HOOK2	ILMN_1683023	PDGFC	ILMN_1701906	CD300C	ILMN_1684982	PDK4	ILMN_1714896	SART3	ILMN_1699071									MAP3K7CL	ILMN_1765801	GAA
ILMN_1682717	IER3	ILMN_1685057	SLC22A4	ILMN_1703650	TNIP1	ILMN_1685009	ITGAM	ILMN_1720623	SYTL3	ILMN_1699423									ZNF146	ILMN_1768958	RASGRP1
ILMN_1682938	ARF3	ILMN_1685289	C16orf58	ILMN_1708934	ADM	ILMN_1685122	COL9A2	ILMN_1721868	KPNA2	ILMN_1699878									RAB27A	ILMN_1772387	TLR2
ILMN_1683023	PDGFC	ILMN_1685521	KLRF1	ILMN_1710514	BCL3	ILMN_1685289	C16orf58	ILMN_1722276	PAFAH1B1	ILMN_1700306									OCIAD2	ILMN_1773935	TMEM165
ILMN_1683026	PSMB10	ILMN_1685625	UCP2	ILMN_1713162	GSTM2	ILMN_1686135	CEP95	ILMN_1724658	BNIP3	ILMN_1700340									ASGR2	ILMN_1775327	PKM
ILMN_1683127	ZNF281	ILMN_1686623	CSF1R	ILMN_1714896	SART3	ILMN_1687998	LPGAT1	ILMN_1725244	HAT1	ILMN_1700584									IER2	ILMN_1775501	IL1B
ILMN_1683792	LAP3	ILMN_1686981	SULF2	ILMN_1726597	FAM65B	ILMN_1689274	NIPA1	ILMN_1727762	CASP1	ILMN_1700695									SLC44A1	ILMN_1780334	KCNJ2
ILMN_1685057	SLC22A4	ILMN_1688231	TREM1	ILMN_1727051	DDX19A	ILMN_1689400	CLK1	ILMN_1728478	CXCL16	ILMN_1701111									GPCPD1	ILMN_1786065	UHRF1
ILMN_1685445	NOTCH2NL	ILMN_1691717	RHBDF2	ILMN_1727965	ALDH3B1	ILMN_1690610	RALY	ILMN_1732452	MAPKAPK3	ILMN_1703180									ETV3	ILMN_1801616	EMP1
ILMN_1685678	EEF1B2	ILMN_1692962	CTDSP2	ILMN_1728047	AKR1A1	ILMN_1690822	VAPA	ILMN_1732575	SEC14L1	ILMN_1703946									ADORA2B	ILMN_1802404	ABCC1
ILMN_1687533	SEMA4D	ILMN_1693242	ZNF296	ILMN_1728662	ALDH3B1	ILMN_1691508	PLAUR	ILMN_1737394	LMNA	ILMN_1708416									ARL6IP1	ILMN_1804448	MSI2
ILMN_1687998	LPGAT1	ILMN_1693352	MRPL20	ILMN_1730986	MALT1	ILMN_1692742	DENND3	ILMN_1737396	PSMD14	ILMN_1708934									ADM	ILMN_1807833	HM13
ILMN_1689160	DPEP2	ILMN_1693352	MRPL20	ILMN_1740015	CD14	ILMN_1692962	CTDSP2	ILMN_1739586	FEZ2	ILMN_1713266									FAM46C	ILMN_1815283	N/A
ILMN_1691071	FCRLA	ILMN_1694274	NDUFC2	ILMN_1741165	SLC11A1	ILMN_1693045	TMED1	ILMN_1745788	CX3CR1	ILMN_1715169									HLA-DRB1	ILMN_2087646	HLX
ILMN_1691364	STAT1	ILMN_1694603	SMARCC1	ILMN_1741464	HOOK3	ILMN_1693136	VTI1B	ILMN_1746846	TTLL4	ILMN_1717163									F13A1	ILMN_2123557	FAM73A
ILMN_1691693	N/A	ILMN_1695423	CD9	ILMN_1744517	GNS	ILMN_1693650	FES	ILMN_1762899	EGR1	ILMN_1718565									CDKN1C	ILMN_2159694	HLA-DRB4
ILMN_1691892	TAGLN2	ILMN_1695640	PTPN22	ILMN_1745423	UTP3	ILMN_1695316	SLC39A8	ILMN_1777058	N/A	ILMN_1722622									CD163	ILMN_2159694_1	N/A
ILMN_1695590	ADRB2	ILMN_1695711	FAM105A	ILMN_1748473	GIMAP4	ILMN_1696420	BRD7	ILMN_1778136	ZMYND15	ILMN_1724658									BNIP3	ILMN_2186108	DGCR6
ILMN_1696360	CTSB	ILMN_1696432	IDH1	ILMN_1749641	FBXO3	ILMN_1699071	MAP3K7CL	ILMN_1785345	GPR84	ILMN_1729691									SLC16A6	ILMN_2261416	CD3D
ILMN_1696419	STOM	ILMN_1699908	IL12RB1	ILMN_1750395	MBD2	ILMN_1699695	TNFRSF21	ILMN_1785732	TNFAIP6	ILMN_1732296									ID3	ILMN_2319000	MATK
ILMN_1696420	BRD7	ILMN_1700413	MAFF	ILMN_1756417	ANKRD37	ILMN_1699836	LSP1	ILMN_1789990	ARFGEF2	ILMN_1735453									FAM98A	ILMN_2325837	CD3D
ILMN_1696432	IDH1	ILMN_1700584	IER2	ILMN_1763837	ANPEP	ILMN_1703891	TBC1D9	ILMN_1800540	CD55	ILMN_1736068									CNOT8	ILMN_2333107	AES
ILMN_1696933	NLRP3	ILMN_1702114	N/A	ILMN_1766269	HM13	ILMN_1703949	KPNB1	ILMN_1801616	EMP1	ILMN_1737003									N/A	ILMN_2336130	N/A
ILMN_1699908	IL12RB1	ILMN_1703650	TNIP1	ILMN_1767193	CR1	ILMN_1704672	NABP2	ILMN_1803925	MTMR3	ILMN_1737252									NRG1	ILMN_2338323	CDC25B
ILMN_1700147	VPREB3	ILMN_1703891	TBC1D9	ILMN_1768510	MAN2B2	ILMN_1704797	CLEC10A	ILMN_1807372	ADORA2A	ILMN_1747630									DEK	ILMN_2355462	CYFIP1
ILMN_1700306	OCIAD2	ILMN_1703949	KPNB1	ILMN_1769299	MTMR11	ILMN_1705686	NRGN	ILMN_1810274	HOXB2	ILMN_1747744									LHFPL2	ILMN_2355463	CYFIP1
ILMN_1700340	ASGR2	ILMN_1707312	NFIL3	ILMN_1769546	RIN2	ILMN_1707062	REV1	ILMN_1810486	RAB34	ILMN_1748883									CDKN2D	ILMN_2368530	IL32
ILMN_1700584	IER2	ILMN_1707551	AFMID	ILMN_1772929	ATP5J	ILMN_1708164	EIF3A	ILMN_1815527	HBD	ILMN_1751400									SKAP1	ILMN_2368597	SMG7
ILMN_1701711	BRD8	ILMN_1707815	N/A	ILMN_1774874	IL1RN	ILMN_1708934	ADM	ILMN_2088612	XPO4	ILMN_1756779									CLTC	ILMN_2375879	VEGFA
ILMN_1702691	TNFAIP3	ILMN_1708164	EIF3A	ILMN_1784218	DDX23	ILMN_1709032	FYCO1	ILMN_2115669	SEMA4C	ILMN_1759983									DR1	ILMN_2376204	LTB
ILMN_1703946	ADORA2B	ILMN_1708416	ARL6IP1	ILMN_1785005	NCF4	ILMN_1711490	ARHGAP26	ILMN_2129015	AFF1	ILMN_1762713									MCEMP1	ILMN_2376205	LTB
ILMN_1705783	NXF1	ILMN_1708881	RAB20	ILMN_1786658	BOLA3	ILMN_1712019	ANKRD17	ILMN_2132599	ANKRD22	ILMN_1767193									CR1	ILMN_2392274	CD82
ILMN_1708881	RAB20	ILMN_1709817	SLC35A5	ILMN_1788416	ABHD17C	ILMN_1712959	DUSP2	ILMN_2258234	KLHL5	ILMN_1768393									SNRPD1	ILMN_2395827	RASGRP4
ILMN_1710017	CD79B	ILMN_1712673	SASH1	ILMN_1788547	GCLM	ILMN_1713668	TSNAX	ILMN_2276996	CCR2	ILMN_1768582									PPP2CB	ILMN_2412380	TSC22D1
ILMN_1712026	NLRP3	ILMN_1713749	CORO1A	ILMN_1794165	PGD	ILMN_1714965	NFKB1	ILMN_2282641	TBXAS1	ILMN_1768958									RASGRP1
ILMN_1712577	FAM174A	ILMN_1714093	RMND5A	ILMN_1795715	DPYD	ILMN_1717180	MTMR6	ILMN_2310896	NLRP3	ILMN_1769546									RIN2
ILMN_1712944	AES	ILMN_1715068	AQP9	ILMN_1801504	RUNX1	ILMN_1718633	LRP5L	ILMN_2320964	ADAR	ILMN_1770977									TMEM134
ILMN_1713266	FAM46C	ILMN_1715636	EIF3B	ILMN_1802257	PCTP	ILMN_1718807	SMC3	ILMN_2342638	ASGR2	ILMN_1772964									CCL8
ILMN_1714896	SART3	ILMN_1716276	N/A	ILMN_1808707	FSCN1	ILMN_1722059	SAFB	ILMN_2362581	FNDC3A	ILMN_1773935									TMEM165
ILMN_1718633	LRP5L	ILMN_1717973	N/A	ILMN_1809522	NACC2	ILMN_1722838	MRPL46	ILMN_2406501	SOD2	ILMN_1773963									GNA15
ILMN_1718977	GADD45B	ILMN_1718960	SERPINB8	ILMN_1810838	MTDH	ILMN_1723969	PLCB1	ILMN_3236156	OSTC	ILMN_1775327									PKM
ILMN_1719905	TLR10	ILMN_1719316	TMED3	ILMN_1815086	NINJ1	ILMN_1727098	PPP1R16B			ILMN_1779410									VAPA
ILMN_1720158	ETS2	ILMN_1719392	FH	ILMN_1815527	HBD	ILMN_1728163	CTDSP1			ILMN_1784737									S1PR4
ILMN_1720771	STX11	ILMN_1719627	SLC27A3	ILMN_2044226	PPP3CA	ILMN_1728471	ARFGEF1			ILMN_1785175									SWAP70
ILMN_1722622	CD163	ILMN_1720771	STX11	ILMN_2053415	LDLR	ILMN_1731048	TLR1			ILMN_1787410									EIF6
ILMN_1722981	TLR5	ILMN_1722294	CPNE8	ILMN_2062001	HOOK3	ILMN_1732475	STYX			ILMN_1787461									RUNX3
ILMN_1724495	SESTD1	ILMN_1722811	CDKN1B	ILMN_2082810	BRD7	ILMN_1733221	SEMA4D			ILMN_1788416									ABHD17C
ILMN_1725244	HAT1	ILMN_1723035	OLR1	ILMN_2083833	CNOT6L	ILMN_1737025	PLCL2			ILMN_1789283									PPP2R5C
ILMN_1727271	WARS	ILMN_1724250	GRN	ILMN_2137536	ZZZ3	ILMN_1737396	PSMD14			ILMN_1791759									CXCL10
ILMN_1730639	SLC22A15	ILMN_1726288	TMEM106B	ILMN_2171289	SAMSN1	ILMN_1737813	ERI3			ILMN_1796075									VPS41
ILMN_1731123	RNF7	ILMN_1728163	CTDSP1	ILMN_2172174	PNP	ILMN_1738909	TROVE2			ILMN_1797822									SEL1L3
ILMN_1732688	DUT	ILMN_1728698	GDE1	ILMN_2216157	GNA12	ILMN_1740742	UROD			ILMN_1798085									EID2B
ILMN_1734878	CD79A	ILMN_1729976	CHAMP1	ILMN_2278729	EIF3B	ILMN_1741881	C9orf72			ILMN_1798706									GPR183
ILMN_1737025	PLCL2	ILMN_1730986	MALT1	ILMN_2296057	CASP2	ILMN_1745075	RPLP0			ILMN_1800602									GCA
ILMN_1737396	PSMD14	ILMN_1731233	GZMH	ILMN_2310968	RUFY1	ILMN_1745356	CXCL9			ILMN_1801156									RLF
ILMN_1737514	KYNU	ILMN_1735453	FAM98A	ILMN_2355953	LILRB4	ILMN_1745772	ASCC3			ILMN_1803819									IQGAP1
ILMN_1738424	CDC42	ILMN_1737254	USP1	ILMN_2364022	SLC16A3	ILMN_1749368	HIST1H3H			ILMN_1804174									FCGR2B
ILMN_1738632	PRKAR1A	ILMN_1740171	DUSP11	ILMN_2379967	FCAR	ILMN_1749419	PRKAG2			ILMN_1807372									ADORA2A
ILMN_1741917	OSCAR	ILMN_1740875	FPR2	ILMN_2383419	GMEB1	ILMN_1750075	DMTF1			ILMN_1808405									HLA-DQA1
ILMN_1742400	CEP350	ILMN_1741148	ALDOA	ILMN_2392274	CD82	ILMN_1750805	ARHGAP30			ILMN_1808707									FSCN1
ILMN_1743187	C6orf120	ILMN_1745423	UTP3	ILMN_2393712	CTTN	ILMN_1752249	PIEZO1			ILMN_1815023									PIM1
ILMN_1745788	CX3CR1	ILMN_1745788	CX3CR1	ILMN_2411139	FIBP	ILMN_1752606	N/A			ILMN_1815733									EIF5
ILMN_1746317	NUPL1	ILMN_1745994	GAS7	ILMN_3234997	MAP7D1	ILMN_1753064	TTC13			ILMN_2080637									ZBTB44
ILMN_1746426	TOMM70A	ILMN_1747355	N/A	ILMN_3269775	TMEM251	ILMN_1753111	NAMPT			ILMN_2101920									HNRNPH1
ILMN_1747504	AHCTF1	ILMN_1756417	ANKRD37			ILMN_1754421	NDUFAF1			ILMN_2115669									SEMA4C
ILMN_1748077	DDX59	ILMN_1756723	DPP7			ILMN_1757347	KIAA0930			ILMN_2124155									ATP11B
ILMN_1751607	FOSB	ILMN_1758939	RIPK2			ILMN_1758146	SIRPA			ILMN_2129927									EXT1
ILMN_1752526	RNF144B	ILMN_1759008	ZNF689			ILMN_1758778	CNTRL			ILMN_2154836									BTG3
ILMN_1756417	ANKRD37	ILMN_1759084	INTS8			ILMN_1758918	BRD2			ILMN_2168217									GPR183
ILMN_1756806	MCL1	ILMN_1760849	NETO2			ILMN_1759952	PSMA5			ILMN_2171289									SAMSN1
ILMN_1758418	TNFSF13B	ILMN_1762674	NUP43			ILMN_1762972	CHD9			ILMN_2172174									PNP
ILMN_1758918	BRD2	ILMN_1762713	MCEMP1			ILMN_1764945	AP3D1			ILMN_2173004									RAB8B
ILMN_1758938	SLC31A2	ILMN_1763080	QARS			ILMN_1765578	TIPARP			ILMN_2199439									CA2
ILMN_1758939	RIPK2	ILMN_1764177	JARID2			ILMN_1766125	LONP1			ILMN_2204876									FLVCR2
ILMN_1761260	COBLL1	ILMN_1765578	TIPARP			ILMN_1766275	PIK3CD			ILMN_2253300									TM9SF1
ILMN_1761941	FAM198B	ILMN_1766165	SNCA			ILMN_1773485	QKI			ILMN_2263466									ACADVL
ILMN_1762255	GSTM1	ILMN_1766169	BCAT1			ILMN_1777663	TOP2B			ILMN_2296057									CASP2
ILMN_1763436	SETX	ILMN_1766275	PIK3CD			ILMN_1777906	MAP7D1			ILMN_2338323									CDC25B
ILMN_1764414	SOS2	ILMN_1768020	HAUS8			ILMN_1778236	PTPN11			ILMN_2344455									G3BP1
ILMN_1772540	ATMIN	ILMN_1768913	TSN			ILMN_1778464	TRAPPC10			ILMN_2345353									LST1
ILMN_1775501	IL1B	ILMN_1768973	HIST2H2A			ILMN_1779015	ZNF467			ILMN_2355462									CYFIP1
ILMN_1777190	CFD	ILMN_1769299	MTMR11			ILMN_1782331	N/A			ILMN_2362293									FBXO38
ILMN_1779677	ZCCHC6	ILMN_1771664	CLEC4E			ILMN_1783695	EPRS			ILMN_2374362									ABHD17B
ILMN_1780546	OSM	ILMN_1772876	ZNF395			ILMN_1784287	TGFBR3			ILMN_2389582									HNRNPL
ILMN_1782305	NR4A2	ILMN_1773245	CCL3L1			ILMN_1784709	GNPDA1			ILMN_2392274									CD82
ILMN_1782704	CD19	ILMN_1773620	SMARCC2			ILMN_1785345	GPR84			ILMN_3235096									SNORA28
ILMN_1784737	S1PR4	ILMN_1773935	TMEM165			ILMN_1789283	PPP2R5C			ILMN_3239965									IDO1
ILMN_1785439	CD79B	ILMN_1777906	MAP7D1			ILMN_1793990	ID2			ILMN_3246409									HNRNPH1
ILMN_1785852	NABP1	ILMN_1778321	SLC2A6			ILMN_1796210	PPRC1
ILMN_1789244	SOX8	ILMN_1780546	OSM			ILMN_1797341	ARID1A
ILMN_1790689	CRISPLD2	ILMN_1780913	PPP2R5C			ILMN_1797731	MS4A6A
ILMN_1794038	FAM49A	ILMN_1782305	NR4A2			ILMN_1798233	PSMB9
ILMN_1796094	CD36	ILMN_1783695	EPRS			ILMN_1799030	CMTM2
ILMN_1796642	NCF2	ILMN_1784871	FASN			ILMN_1800912	ZNF106
ILMN_1796669	PSEN1	ILMN_1787127	SLC43A2			ILMN_1802457	MAX
ILMN_1801616	EMP1	ILMN_1787212	CDKN1A			ILMN_1803788	LGALS3
ILMN_1803788	LGALS3	ILMN_1787509	HELZ2			ILMN_1803997	SDCCAG3
ILMN_1803988	MCL1	ILMN_1788213	FRAT2			ILMN_1809193	PSEN1
ILMN_1806023	JUN	ILMN_1790741	RNF126			ILMN_1809695	CAMK2G
ILMN_1807372	ADORA2A	ILMN_1793743	DIRC2			ILMN_1810385	ATR
ILMN_1810214	JUND	ILMN_1796210	PPRC1			ILMN_1810486	RAB34
ILMN_1810486	RAB34	ILMN_1798706	GPR183			ILMN_1810680	N/A
ILMN_1811258	RELB	ILMN_1799062	NFKB2			ILMN_1813775	GAK
ILMN_1813604	NDUFB7	ILMN_1800540	CD55			ILMN_1815148	MAN2A2
ILMN_2044226	PPP3CA	ILMN_1801077	PLIN2			ILMN_2062001	HOOK3
ILMN_2050911	SLC22A4	ILMN_1802457	MAX			ILMN_2087575	ZC3H4
ILMN_2055781	KLRF1	ILMN_1803853	NOL7			ILMN_2092118	FPR1
ILMN_2056167	OSTC	ILMN_1805228	LRG1			ILMN_2109197	EPB41L3
ILMN_2083469	IRS2	ILMN_1806023	JUN			ILMN_2113126	RNASE3
ILMN_2086077	JUNB	ILMN_1807277	IFI30			ILMN_2137536	ZZZ3
ILMN_2088437	CX3CR1	ILMN_1807277	IFI30			ILMN_2141941	TOR1AIP1
ILMN_2094061	IMPA2	ILMN_1807596	UBAP1			ILMN_2150258	ZFP36L2
ILMN_2100437	HBB	ILMN_1808768	ROCK1			ILMN_2163819	KIF21B
ILMN_2109197	EPB41L3	ILMN_1809931	NDRG1			ILMN_2172174	PNP
ILMN_2129927	EXT1	ILMN_1810680	N/A			ILMN_2211780	SLC25A4
ILMN_2158336	SH3GLB2	ILMN_1810941	COMT			ILMN_2218780	PDP1
ILMN_2172174	PNP	ILMN_1811702	GRN			ILMN_2258234	KLHL5
ILMN_2186061	PFKFB3	ILMN_1813795	RASSF5			ILMN_2264625	NIPBL
ILMN_2186108	DGCR6	ILMN_1815733	EIF5			ILMN_2273261	FBXO3
ILMN_2197101	DDX19A	ILMN_2046024	DUSP11			ILMN_2301624	MACF1
ILMN_2199439	CA2	ILMN_2055781	KLRF1			ILMN_2311796	TES
ILMN_2216157	GNA12	ILMN_2063586	CLIC4			ILMN_2322806	CAST
ILMN_2218856	N/A	ILMN_2067607	TMEM106B			ILMN_2339835	PTGS1
ILMN_2226015	LRRK2	ILMN_2086077	JUNB			ILMN_2345142	SULF2
ILMN_2231242	HMGB1	ILMN_2087575	ZC3H4			ILMN_2348090	MRPL55
ILMN_2233783	CD38	ILMN_2088437	CX3CR1			ILMN_2355225	N/A
ILMN_2236800	SON	ILMN_2117623	PLXNC1			ILMN_2365479	SNX1
ILMN_2277099	YWHAB	ILMN_2138765	PLIN2			ILMN_2365484	SNX1
ILMN_2310896	NLRP3	ILMN_2140990	CAMK1			ILMN_2370336	MS4A4A
ILMN_2336130	N/A	ILMN_2150851	SERPINB2			ILMN_2375002	MAP4K4
ILMN_2337655	WARS	ILMN_2151281	GABARAPL			ILMN_2375003	MAP4K4
ILMN_2337928	CXCR5	ILMN_2168217	GPR183			ILMN_2380418	BICD2
ILMN_2339955	NR4A2	ILMN_2169761	CPNE8			ILMN_2380850	SDCCAG3
ILMN_2348243	STRADA	ILMN_2173004	RAB8B			ILMN_2390114	AP3D1
ILMN_2349600	BRD8	ILMN_2184373	CXCL8			ILMN_2395474	REV1
ILMN_2352580	MBD1	ILMN_2185984	SASH1			ILMN_2401933	ATP2B1
ILMN_2353358	LGALS8	ILMN_2196588	N/A			ILMN_2406335	ANKRD17
ILMN_2358652	NXF1	ILMN_2197846	HADHB			ILMN_2408851	ARHGAP30
ILMN_2365091	FCAR	ILMN_2211189	IKBKAP			ILMN_3234997	MAP7D1
ILMN_2366212	CD79B	ILMN_2216157	GNA12			ILMN_3235185	SNRNP200
ILMN_2367418	OSCAR	ILMN_2218780	PDP1			ILMN_3237956	ZC3H12C
ILMN_2371825	AGL	ILMN_2218856	N/A			ILMN_3238435	SNORA12
ILMN_2376204	LTB	ILMN_2271379	SDCCAG3			ILMN_3251085	RBBP4
ILMN_2376205	LTB	ILMN_2318638	TGIF1			ILMN_3258795	FAM13B
ILMN_2376431	CCR2	ILMN_2318643	TGIF1			ILMN_3299520	PRKCB
ILMN_2379718	RAB24	ILMN_2331544	MBP			ILMN_3306730	RBM47
ILMN_2389844	SP3	ILMN_2339955	NR4A2
ILMN_2391861	N/A	ILMN_2345142	SULF2
ILMN_2393046	NHLRC3	ILMN_2354391	N/A
ILMN_2395474	REV1	ILMN_2363426	MAX
ILMN_2395827	RASGRP4	ILMN_2365091	FCAR
ILMN_2401714	MS4A1	ILMN_2365484	SNX1
ILMN_2401933	ATP2B1	ILMN_2370976	MYOF
ILMN_2402131	TAF15	ILMN_2372413	BID
ILMN_2402463	SHMT1	ILMN_2379469	EIF3B
ILMN_2403237	CHN2	ILMN_2379967	FCAR
ILMN_2405129	ARHGEF1	ILMN_2390859	NFKB2
ILMN_2414762	TLR10	ILMN_2396410	CS
ILMN_3235096	SNORA28	ILMN_2397028	SERPINB8
ILMN_3240144	N/A	ILMN_2402131	TAF15
ILMN_3242377	NACC2	ILMN_3235096	SNORA28
ILMN_3251629	N/A	ILMN_3245116	GOLIM4
ILMN_3272500	IFI27L1	ILMN_3251293	TMX1
		ILMN_3251506	ZNF69
		ILMN_3307648	CS
		ILMN_3308138	RNU4-2
		ILMN_3308265	MIR302C
