# Supplementary material for: Expression of socially sensitive genes: The multi-ethnic study of atherosclerosis
Source: PLoS One. 2019 Apr 11;14(4):e0214061. doi: 10.1371/journal.pone.0214061 (PMC6459532; doi:10.1371/journal.pone.0214061)
Supplement: S4 Table — (CSV) [file pone.0214061.s004.csv]

S4. Transcripts (Genes) Selected via Elastic Net by Social Environmental Factor
Loneliness		Major or Lifetime Discrimination		Chronic Burden		Social Support		Adult SES		Childhood SES
Illumina Transcript ID #	Gene Symbol	Illumina Transcript ID #	Gene Symbol	Illumina Transcript ID #	Gene Symbol	Illumina Transcript ID #	Gene Symbol	Illumina Transcript ID #	Gene Symbol	Illumina Transcript ID #	Gene Symbol
ILMN_1651828	CCT3	ILMN_1666733	CXCL8	ILMN_1674574	VNN1	ILMN_1673586	SLC6A6	ILMN_1652906	GBGT1	ILMN_1689274	NIPA1
ILMN_1652825	IL10RA	ILMN_1671891	PID1	ILMN_1685057	SLC22A4	ILMN_1686884	IL1RAP	ILMN_1656310	IDO1
ILMN_1653443	CDK2	ILMN_1682717	IER3	ILMN_1687384	IFI6	ILMN_1694966	ASGR2	ILMN_1660027	FCGR2B
ILMN_1653480	CCDC125	ILMN_1685521	KLRF1	ILMN_1689160	DPEP2	ILMN_1696432	IDH1	ILMN_1661409	FAM208A
ILMN_1656011	RGS1	ILMN_1695640	PTPN22	ILMN_1689734	IL1RN	ILMN_1703946	ADORA2B	ILMN_1662617	PPP2R3C
ILMN_1668134	GSTM1	ILMN_1699908	IL12RB1	ILMN_1721868	KPNA2	ILMN_1714896	SART3	ILMN_1665217	CEP19
ILMN_1670134	FADS1	ILMN_1707551	AFMID	ILMN_1753613	HOXA5	ILMN_1727762	CASP1	ILMN_1667711	PLA2G16
ILMN_1670145	DFNA5	ILMN_1707815	N/A	ILMN_1777058	N/A	ILMN_2342638	ASGR2	ILMN_1695590	ADRB2
ILMN_1673586	SLC6A6	ILMN_1719392	FH	ILMN_1809193	PSEN1			ILMN_1696432	IDH1
ILMN_1674574	VNN1	ILMN_1722294	CPNE8	ILMN_2082762	SNORD68			ILMN_1696975	USP1
ILMN_1675669	IBTK	ILMN_1728698	GDE1	ILMN_2319000	MATK			ILMN_1699423	ZNF146
ILMN_1677574	GALNT6	ILMN_1740171	DUSP11	ILMN_2380850	SDCCAG3			ILMN_1700584	IER2
ILMN_1679268	PELI1	ILMN_1756723	DPP7					ILMN_1700695	SLC44A1
ILMN_1682147	HOOK2	ILMN_1760849	NETO2					ILMN_1701111	GPCPD1
ILMN_1682938	ARF3	ILMN_1768020	HAUS8					ILMN_1703180	ETV3
ILMN_1683026	PSMB10	ILMN_1769299	MTMR11					ILMN_1715169	HLA-DRB1
ILMN_1685057	SLC22A4	ILMN_1780913	PPP2R5C					ILMN_1718565	CDKN1C
ILMN_1685445	NOTCH2NL	ILMN_1800540	CD55					ILMN_1724658	BNIP3
ILMN_1687247	SPATA20	ILMN_1801077	PLIN2					ILMN_1751400	SKAP1
ILMN_1687384	IFI6	ILMN_1809931	NDRG1					ILMN_1758938	SLC31A2
ILMN_1687998	LPGAT1	ILMN_1810941	COMT					ILMN_1762713	MCEMP1
ILMN_1696360	CTSB	ILMN_2140990	CAMK1					ILMN_1767193	CR1
ILMN_1696432	IDH1	ILMN_2151281	GABARAPL					ILMN_1768393	SNRPD1
ILMN_1699358	GNA12	ILMN_2184373	CXCL8					ILMN_1768582	PPP2CB
ILMN_1699908	IL12RB1	ILMN_2185984	SASH1					ILMN_1779410	VAPA
ILMN_1700340	ASGR2	ILMN_2331544	MBP					ILMN_1787410	EIF6
ILMN_1706523	FCGR2A	ILMN_2390859	NFKB2					ILMN_1787461	RUNX3
ILMN_1708779	GNLY							ILMN_1788416	ABHD17C
ILMN_1712577	FAM174A							ILMN_1796075	VPS41
ILMN_1712944	AES							ILMN_1798085	EID2B
ILMN_1714896	SART3							ILMN_1798706	GPR183
ILMN_1719232	DGCR14							ILMN_1801156	RLF
ILMN_1723035	OLR1							ILMN_1808405	HLA-DQA1
ILMN_1730639	SLC22A15							ILMN_2080637	ZBTB44
ILMN_1731123	RNF7							ILMN_2101920	HNRNPH1
ILMN_1731233	GZMH							ILMN_2115669	SEMA4C
ILMN_1746317	NUPL1							ILMN_2129927	EXT1
ILMN_1746426	TOMM70A							ILMN_2173004	RAB8B
ILMN_1752526	RNF144B							ILMN_2218780	PDP1
ILMN_1756723	DPP7							ILMN_2236625	UTS2
ILMN_1761941	FAM198B							ILMN_2338323	CDC25B
ILMN_1772540	ATMIN							ILMN_2362293	FBXO38
ILMN_1777190	CFD							ILMN_2389582	HNRNPL
ILMN_1785005	NCF4							ILMN_2402463	SHMT1
ILMN_1785439	CD79B							ILMN_3246409	HNRNPH1
ILMN_1789244	SOX8
ILMN_1791483	PDE4D
ILMN_1796075	VPS41
ILMN_1796642	NCF2
ILMN_1801616	EMP1
ILMN_1806023	JUN
ILMN_1811258	RELB
ILMN_1815656	SERINC3
ILMN_2100437	HBB
ILMN_2115669	SEMA4C
ILMN_2174612	CNOT8
ILMN_2186061	PFKFB3
ILMN_2186108	DGCR6
ILMN_2226015	LRRK2
ILMN_2268409	VPS13B
ILMN_2277099	YWHAB
ILMN_2336130	N/A
ILMN_2340721	TMEM134
ILMN_2348243	STRADA
ILMN_2352580	MBD1
ILMN_2353358	LGALS8
ILMN_2367418	OSCAR
ILMN_2376431	CCR2
ILMN_2393046	NHLRC3
ILMN_2395827	RASGRP4
ILMN_2402463	SHMT1
ILMN_2403237	CHN2
ILMN_3235096	SNORA28
ILMN_3251629	N/A
